# Supplementary material for: Antagonistic roles in fetal development and adult physiology for the oppositely imprinted Grb10 and Dlk1 genes
Source: PubMed Central journal article supplement (PMC4280702; doi:10.1186/s12915-014-0099-8), 2014-12-31
Supplement: 12915_2014_99_MOESM1_ESM.pdf [file 12915_2014_99_MOESM1_ESM.pdf]

**A**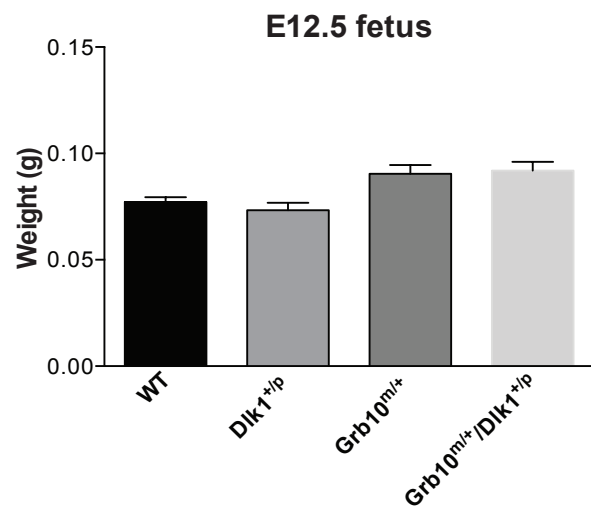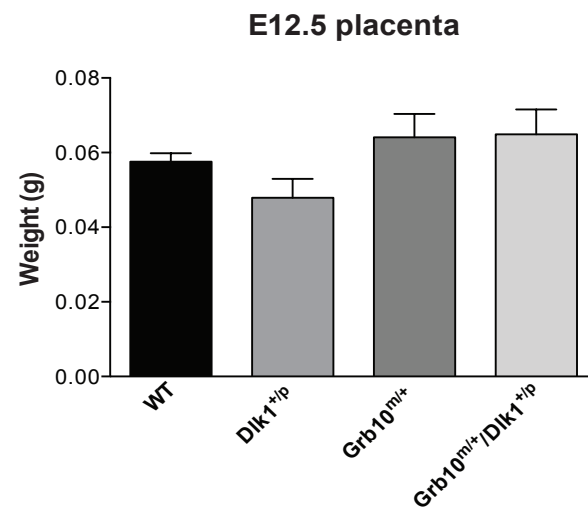**B**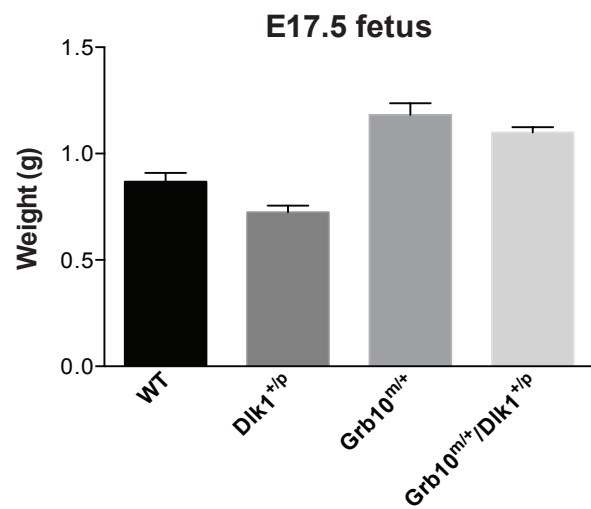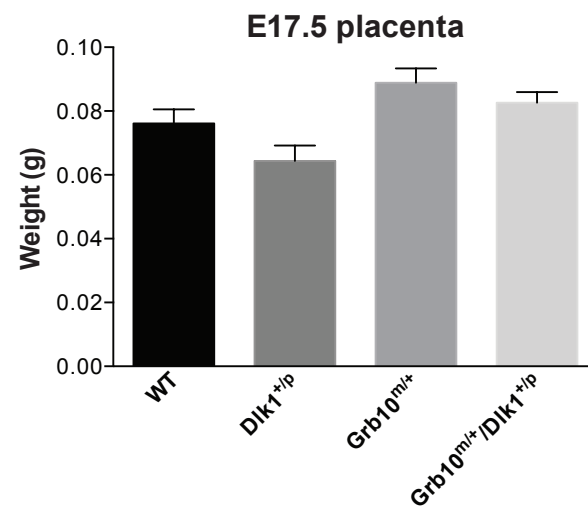**C**

|                                                                                         | E12.5 fetus | E12.5 placenta | E17.5 fetus | E17.5 placenta |
|-----------------------------------------------------------------------------------------|-------------|----------------|-------------|----------------|
| <i>WT</i> vs <i>Grb10</i> <sup>mi+</sup>                                                | *           | ns             | ***         | ns             |
| <i>WT</i> vs <i>Dlk1</i> <sup>+ip</sup>                                                 | ns          | ns             | ns          | ns             |
| <i>WT</i> vs <i>Grb10</i> <sup>mi+</sup> / <i>Dlk1</i> <sup>+ip</sup>                   | **          | ns             | **          | ns             |
| <i>Grb10</i> <sup>mi+</sup> vs <i>Dlk1</i> <sup>+ip</sup>                               | *           | ns             | ***         | **             |
| <i>Grb10</i> <sup>mi+</sup> vs <i>Grb10</i> <sup>mi+</sup> / <i>Dlk1</i> <sup>+ip</sup> | ns          | ns             | ns          | ns             |
| <i>Dlk1</i> <sup>+ip</sup> vs <i>Grb10</i> <sup>mi+</sup> / <i>Dlk1</i> <sup>+ip</sup>  | **          | ns             | ***         | *              |
