# Supplementary material for: Antagonistic roles in fetal development and adult physiology for the oppositely imprinted Grb10 and Dlk1 genes
Source: PubMed Central journal article supplement (PMC4280702; doi:10.1186/s12915-014-0099-8), 2014-12-31
Supplement: 12915_2014_99_MOESM2_ESM.pdf [file 12915_2014_99_MOESM2_ESM.pdf]

**A**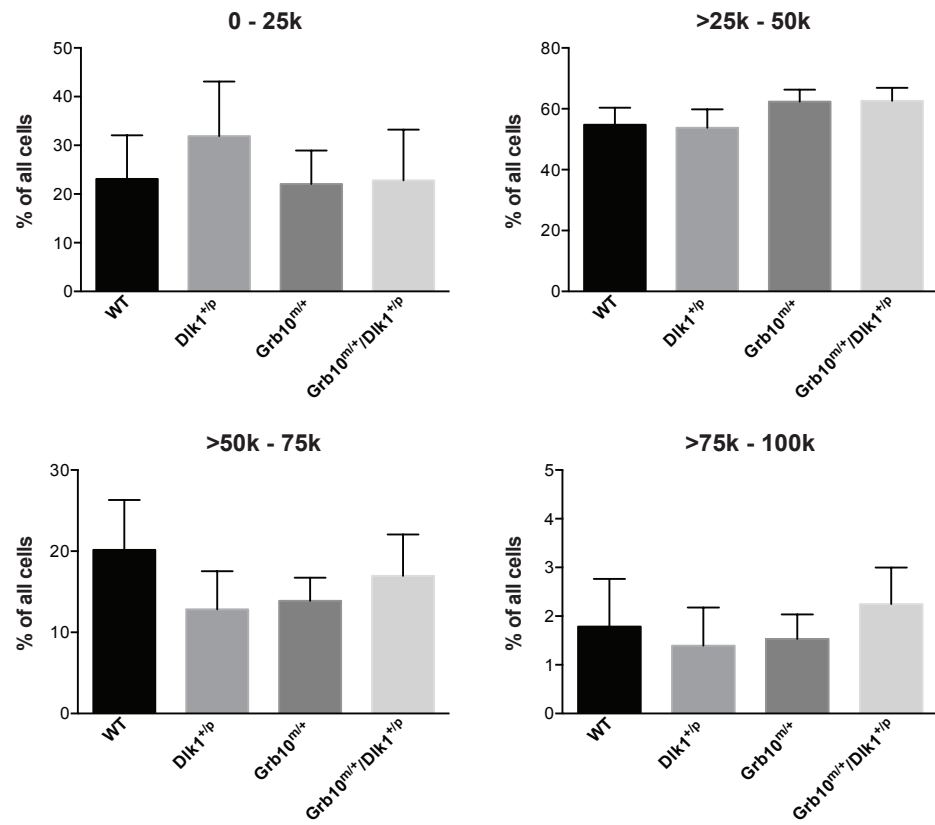**B**

|                                                                                        | 0-25k | >25k-50k | >50k-75k | >75k-100k |
|----------------------------------------------------------------------------------------|-------|----------|----------|-----------|
| <i>WT vs Grb10</i> <sup>m/+</sup>                                                      | ns    | ns       | ns       | ns        |
| <i>WT vs Dik1</i> <sup>+p</sup>                                                        | ns    | ns       | ns       | ns        |
| <i>WT vs Grb10</i> <sup>m/+</sup> / <i>Dik1</i> <sup>+p</sup>                          | ns    | ns       | ns       | ns        |
| <i>Grb10</i> <sup>m/+</sup> vs <i>Dik1</i> <sup>+p</sup>                               | ns    | ns       | ns       | ns        |
| <i>Grb10</i> <sup>m/+</sup> vs <i>Grb10</i> <sup>m/+</sup> / <i>Dik1</i> <sup>+p</sup> | ns    | ns       | ns       | ns        |
| <i>Dik1</i> <sup>+p</sup> vs <i>Grb10</i> <sup>m/+</sup> / <i>Dik1</i> <sup>+p</sup>   | ns    | ns       | ns       | ns        |

**C**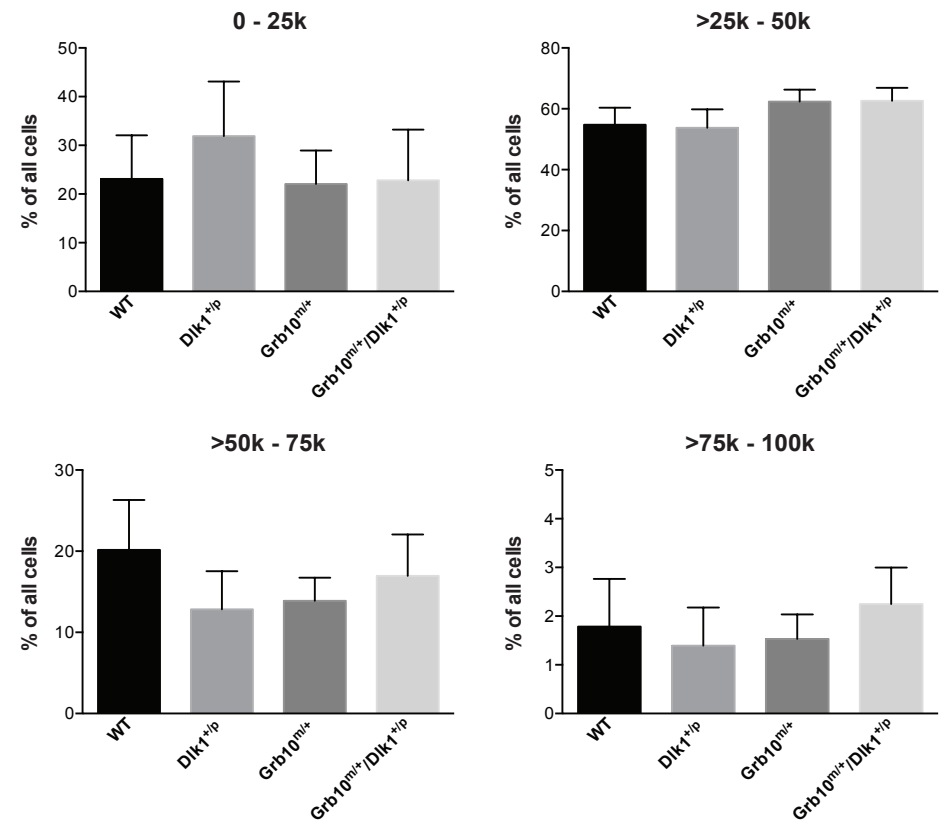**D**

|                                                                                        | 0-25k | >25k-50k | >50k-75k | >75k-100k |
|----------------------------------------------------------------------------------------|-------|----------|----------|-----------|
| <i>WT vs Grb10</i> <sup>m/+</sup>                                                      | ns    | ns       | ns       | ns        |
| <i>WT vs Dik1</i> <sup>+p</sup>                                                        | ns    | ns       | ns       | ns        |
| <i>WT vs Grb10</i> <sup>m/+</sup> / <i>Dik1</i> <sup>+p</sup>                          | ns    | ns       | ns       | ns        |
| <i>Grb10</i> <sup>m/+</sup> vs <i>Dik1</i> <sup>+p</sup>                               | ns    | ns       | ns       | ns        |
| <i>Grb10</i> <sup>m/+</sup> vs <i>Grb10</i> <sup>m/+</sup> / <i>Dik1</i> <sup>+p</sup> | ns    | ns       | ns       | ns        |
| <i>Dik1</i> <sup>+p</sup> vs <i>Grb10</i> <sup>m/+</sup> / <i>Dik1</i> <sup>+p</sup>   | ns    | ns       | ns       | ns        |
