# Supplementary material for: Antagonistic roles in fetal development and adult physiology for the oppositely imprinted Grb10 and Dlk1 genes
Source: PubMed Central journal article supplement (PMC4280702; doi:10.1186/s12915-014-0099-8), 2014-12-31
Supplement: 12915_2014_99_MOESM3_ESM.pdf [file 12915_2014_99_MOESM3_ESM.pdf]

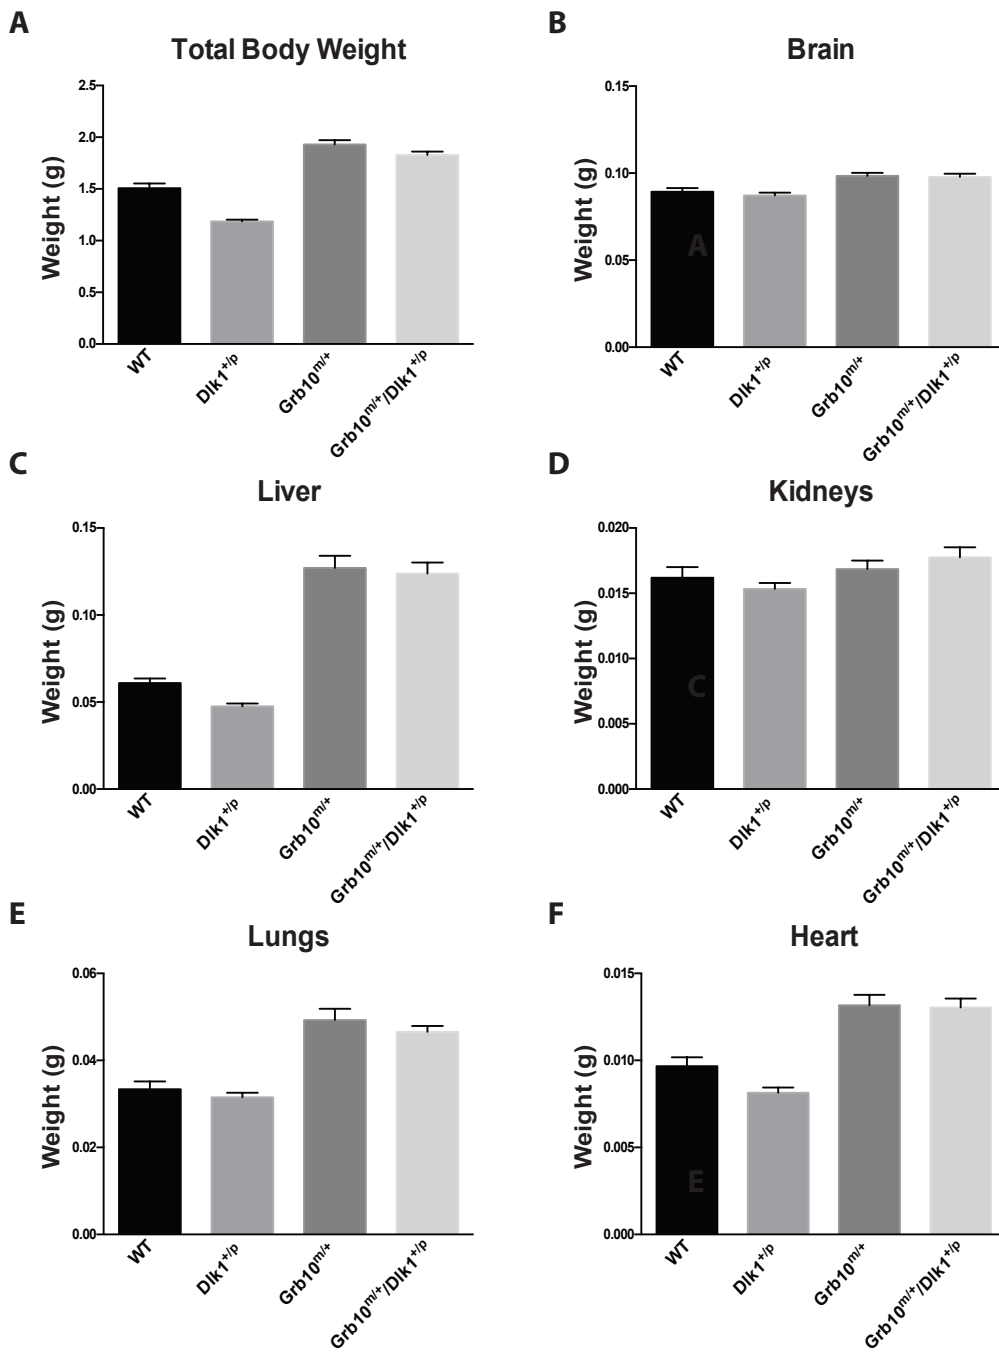

**G**

|                                                                      | Total body weight | Brain | Liver | Kidneys | Lungs | Heart |
|----------------------------------------------------------------------|-------------------|-------|-------|---------|-------|-------|
| <i>WT vs Grb10<sup>m/+</sup></i>                                     | ***               | *     | ***   | ns      | ***   | ***   |
| <i>WT vs Dlk1<sup>+/p</sup></i>                                      | ***               | ns    | ns    | ns      | ns    | ns    |
| <i>WT vs Grb10<sup>m/+</sup>/Dlk1<sup>+/p</sup></i>                  | ***               | *     | ***   | ns      | ***   | ***   |
| <i>Grb10<sup>m/+</sup> vs Dlk1<sup>+/p</sup></i>                     | ***               | ***   | ***   | ns      | ***   | ***   |
| <i>Grb10<sup>m/+</sup> vs Grb10<sup>m/+</sup>/Dlk1<sup>+/p</sup></i> | ns                | ns    | ns    | ns      | ns    | ns    |
| <i>Dlk1<sup>+/p</sup> vs Grb10<sup>m/+</sup>/Dlk1<sup>+/p</sup></i>  | ***               | ***   | ***   | *       | ***   | ***   |
