# Supplementary material for: Antagonistic roles in fetal development and adult physiology for the oppositely imprinted Grb10 and Dlk1 genes
Source: PubMed Central journal article supplement (PMC4280702; doi:10.1186/s12915-014-0099-8), 2014-12-31
Supplement: 12915_2014_99_MOESM5_ESM.pdf [file 12915_2014_99_MOESM5_ESM.pdf]

**A**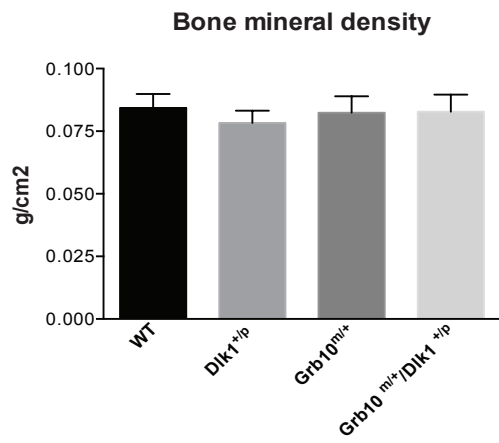**B**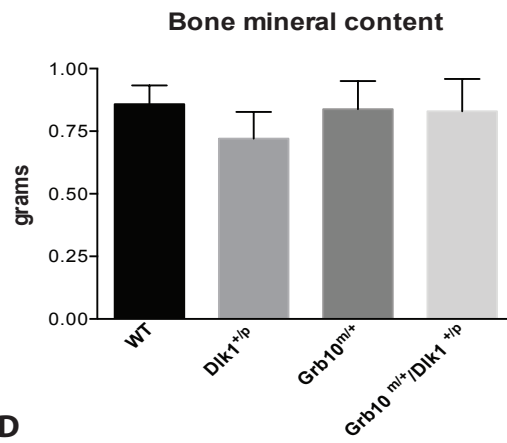**C**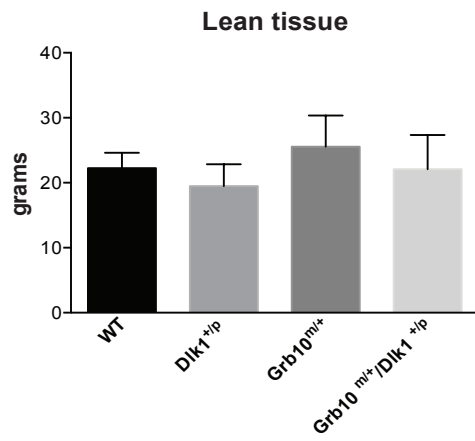**D**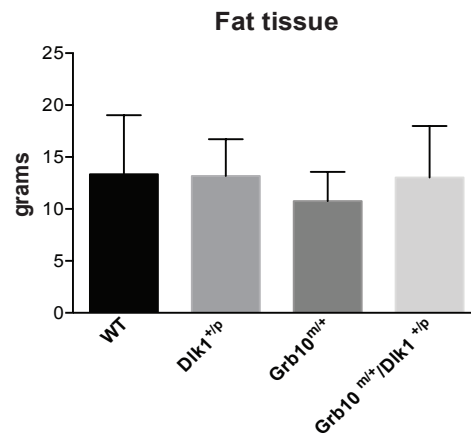**E**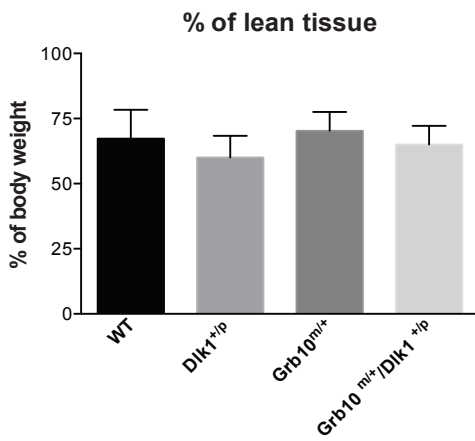**F**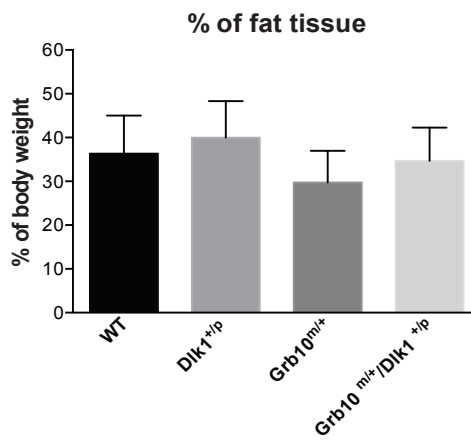**G**

|                                                                                        | BMD | BMC | Lean tissue | Fat tissue | % lean tissue | % fat tissue |
|----------------------------------------------------------------------------------------|-----|-----|-------------|------------|---------------|--------------|
| <i>WT vs Grb10</i> <sup>m/+</sup>                                                      | ns  | ns  | ns          | ns         | ns            | ns           |
| <i>WT vs Dlk1</i> <sup>+p</sup>                                                        | ns  | *   | ns          | ns         | ns            | ns           |
| <i>WT vs Grb10</i> <sup>m/+</sup> / <i>Dlk1</i> <sup>+p</sup>                          | ns  | ns  | ns          | ns         | ns            | ns           |
| <i>Grb10</i> <sup>m/+</sup> vs <i>Dlk1</i> <sup>+p</sup>                               | ns  | ns  | **          | ns         | *             | *            |
| <i>Grb10</i> <sup>m/+</sup> vs <i>Grb10</i> <sup>m/+</sup> / <i>Dlk1</i> <sup>+p</sup> | ns  | ns  | ns          | ns         | ns            | ns           |
| <i>Dlk1</i> <sup>+p</sup> vs <i>Grb10</i> <sup>m/+</sup> / <i>Dlk1</i> <sup>+p</sup>   | ns  | ns  | ns          | ns         | ns            | ns           |
