# Supplementary material for: Antagonistic roles in fetal development and adult physiology for the oppositely imprinted Grb10 and Dlk1 genes
Source: PubMed Central journal article supplement (PMC4280702; doi:10.1186/s12915-014-0099-8), 2014-12-31
Supplement: 12915_2014_99_MOESM7_ESM.pdf [file 12915_2014_99_MOESM7_ESM.pdf]

**A**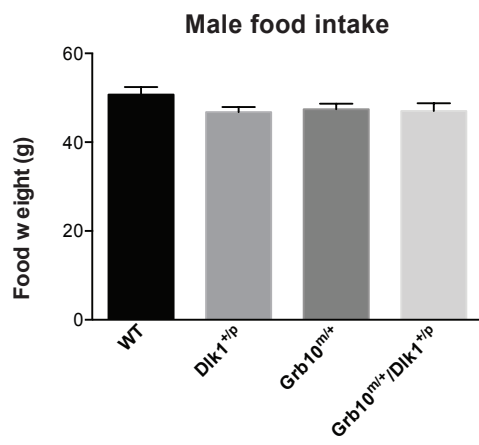**B**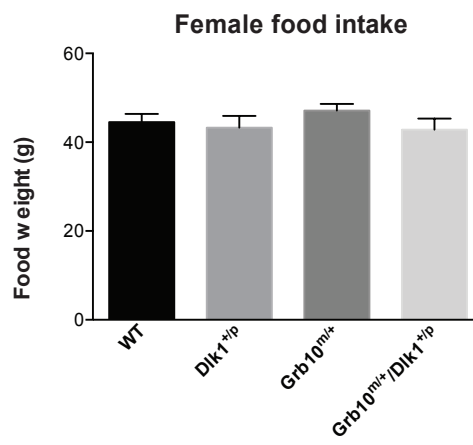**C**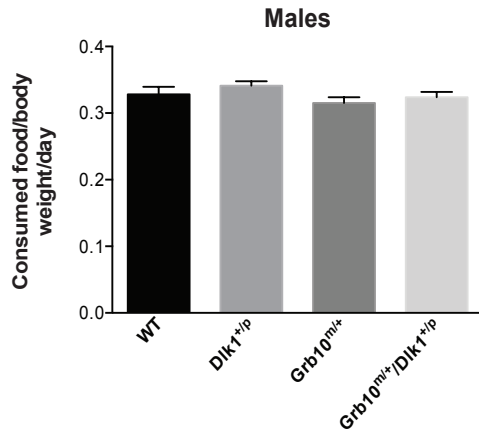**D**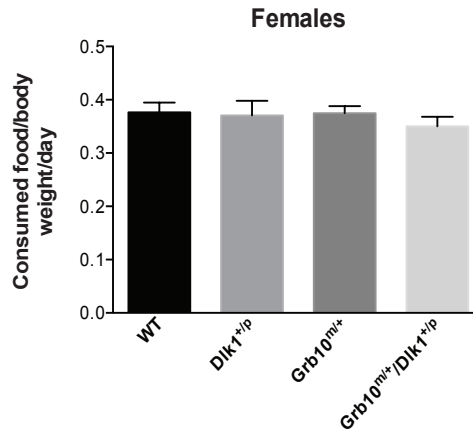**E**

|                                                                                         | Food males | Food females | Consumption rate males | Consumption rate females |
|-----------------------------------------------------------------------------------------|------------|--------------|------------------------|--------------------------|
| <i>WT vs Grb10</i> <sup>m/+</sup>                                                       | ns         | ns           | ns                     | ns                       |
| <i>WT vs Dlk1</i> <sup>+/p</sup>                                                        | ns         | ns           | ns                     | ns                       |
| <i>WT vs Grb10</i> <sup>m/+</sup> / <i>Dlk1</i> <sup>+/p</sup>                          | ns         | ns           | ns                     | ns                       |
| <i>Grb10</i> <sup>m/+</sup> vs <i>Dlk1</i> <sup>+/p</sup>                               | ns         | ns           | ns                     | ns                       |
| <i>Grb10</i> <sup>m/+</sup> vs <i>Grb10</i> <sup>m/+</sup> / <i>Dlk1</i> <sup>+/p</sup> | ns         | ns           | ns                     | ns                       |
| <i>Dlk1</i> <sup>+/p</sup> vs <i>Grb10</i> <sup>m/+</sup> / <i>Dlk1</i> <sup>+/p</sup>  | ns         | ns           | ns                     | ns                       |
